# Supplementary material for: Dietary Guanidine Acetic Acid Improves Ruminal Antioxidant Capacity and Alters Rumen Fermentation and Microflora in Rapid-Growing Lambs
Source: MDPI journal article supplement (doi:10.3390/antiox12030772), 2023-03-22
Supplement: s1 [file s1]

**Table S1.** Effects of forage type and GAA addition on alpha diversity of ruminal microbiota

| Items           | Forage | GAA addition |        |        | SEM   | <i>p</i> -value |       |              |
|-----------------|--------|--------------|--------|--------|-------|-----------------|-------|--------------|
|                 |        | control      | UGAA   | CGAA   |       | Forage          | GAA   | Forage × GAA |
| Stage 1 (60 d)  |        |              |        |        |       |                 |       |              |
| sobs            | OH     | 803          | 769    | 742    | 77.20 | 0.837           | 0.848 | 0.935        |
|                 | OHWS   | 784          | 806    | 763    |       |                 |       |              |
| shannon         | OH     | 4.78         | 3.96   | 4.47   | 0.29  | 0.968           | 0.398 | 0.120        |
|                 | OHWS   | 4.49         | 4.69   | 4.07   |       |                 |       |              |
| simpson         | OH     | 0.02         | 0.09   | 0.03   | 0.02  | 0.974           | 0.403 | 0.051        |
|                 | OHWS   | 0.04         | 0.03   | 0.08   |       |                 |       |              |
| ace             | OH     | 977.12       | 969.76 | 895.42 | 87.94 | 0.872           | 0.856 | 0.874        |
|                 | OHWS   | 949.03       | 972.14 | 955.80 |       |                 |       |              |
| chao            | OH     | 983.17       | 972.26 | 890.65 | 82.72 | 0.795           | 0.788 | 0.836        |
|                 | OHWS   | 952.68       | 987.24 | 959.66 |       |                 |       |              |
| Stage 2 (120 d) |        |              |        |        |       |                 |       |              |
| sobs            | OH     | 759          | 661    | 691    | 33.20 | 0.017           | 0.249 | 0.431        |
|                 | OHWS   | 780          | 763    | 783    |       |                 |       |              |
| shannon         | OH     | 4.57         | 4.42   | 4.5    | 0.17  | 0.112           | 0.741 | 0.355        |
|                 | OHWS   | 4.52         | 4.81   | 4.81   |       |                 |       |              |
| simpson         | OH     | 0.03         | 0.03   | 0.03   | 0.01  | 0.833           | 0.302 | 0.194        |
|                 | OHWS   | 0.05         | 0.02   | 0.03   |       |                 |       |              |
| ace             | OH     | 926.20       | 824.50 | 849.65 | 35.77 | 0.011           | 0.152 | 0.661        |
|                 | OHWS   | 973.77       | 936.91 | 939.90 |       |                 |       |              |
| chao            | OH     | 928.79       | 834.09 | 849.33 | 39.92 | 0.010           | 0.245 | 0.729        |
|                 | OHWS   | 985.44       | 949.49 | 957.45 |       |                 |       |              |

OH, the rations with the forage type of oaten hay; OHWS, the rations with the forage type of oaten hay plus wheat silage.
